# Supplementary material for: DDX11 loss causes replication stress and pharmacologically exploitable DNA repair defects
Source: PubMed Central journal article supplement (PMC8092582; doi:10.1073/pnas.2024258118), 2021-04-20
Supplement: pnas.2024258118.sapp.pdf [file pnas.2024258118.sapp.pdf]

## **Supplementary Information Appendix**

### **Targeting DDX11 in cancers causes replication stress and pharmacologically exploitable DNA repair defects**

Nanda Kumar Jegadesan<sup>1</sup> and Dana Branzei<sup>1,2,\*</sup>

<sup>1</sup> IFOM, the FIRC Institute of Molecular Oncology, Via Adamello 16, 20139, Milan, Italy

<sup>2</sup> Istituto di Genetica Molecolare, Consiglio Nazionale delle Ricerche (IGM-CNR), Via Abbiategrasso 207, 27100, Pavia, Italy

\* Corresponding author

**E-mail: [dana.branzei@ifom.eu](mailto:dana.branzei@ifom.eu) (D.B.)**

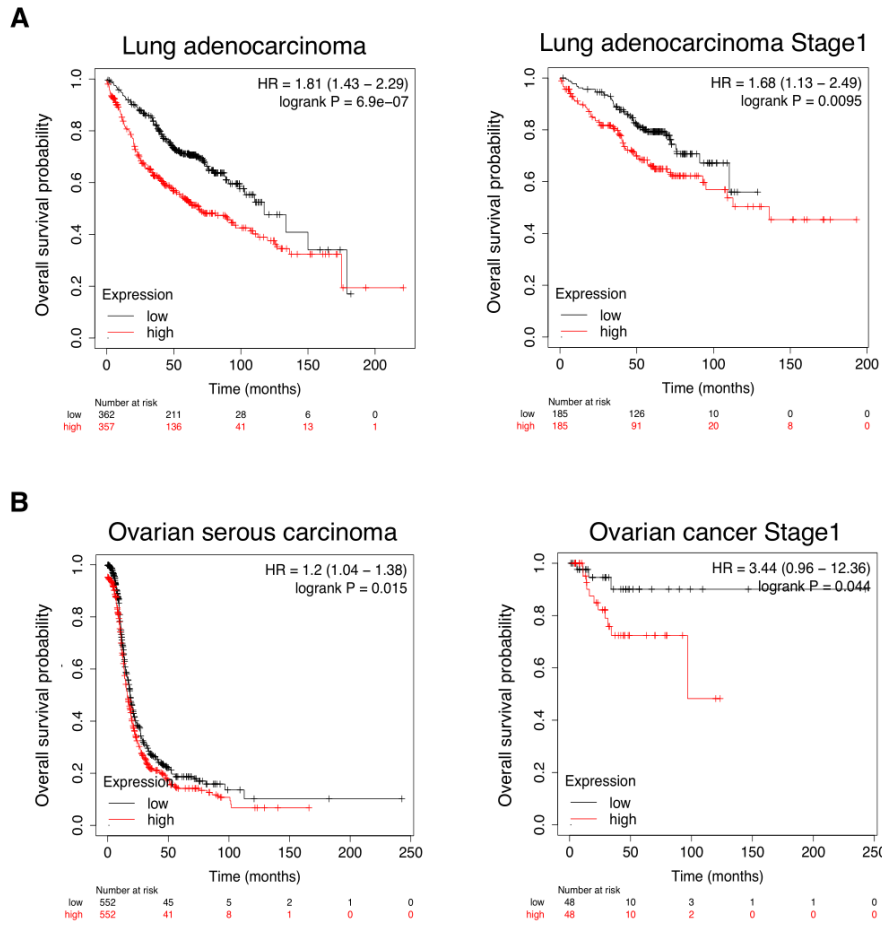

**Fig. S1. Kaplan–Meier survival probability plots stratified by DDX11 expression levels**

**A and B,** Kaplan–Meier overall survival plot of patients with lung adenocarcinoma and ovarian serous carcinoma, stratified by DDX11 median expression level. Patients sample numbers are indicated below the Kaplan–Meier plots.

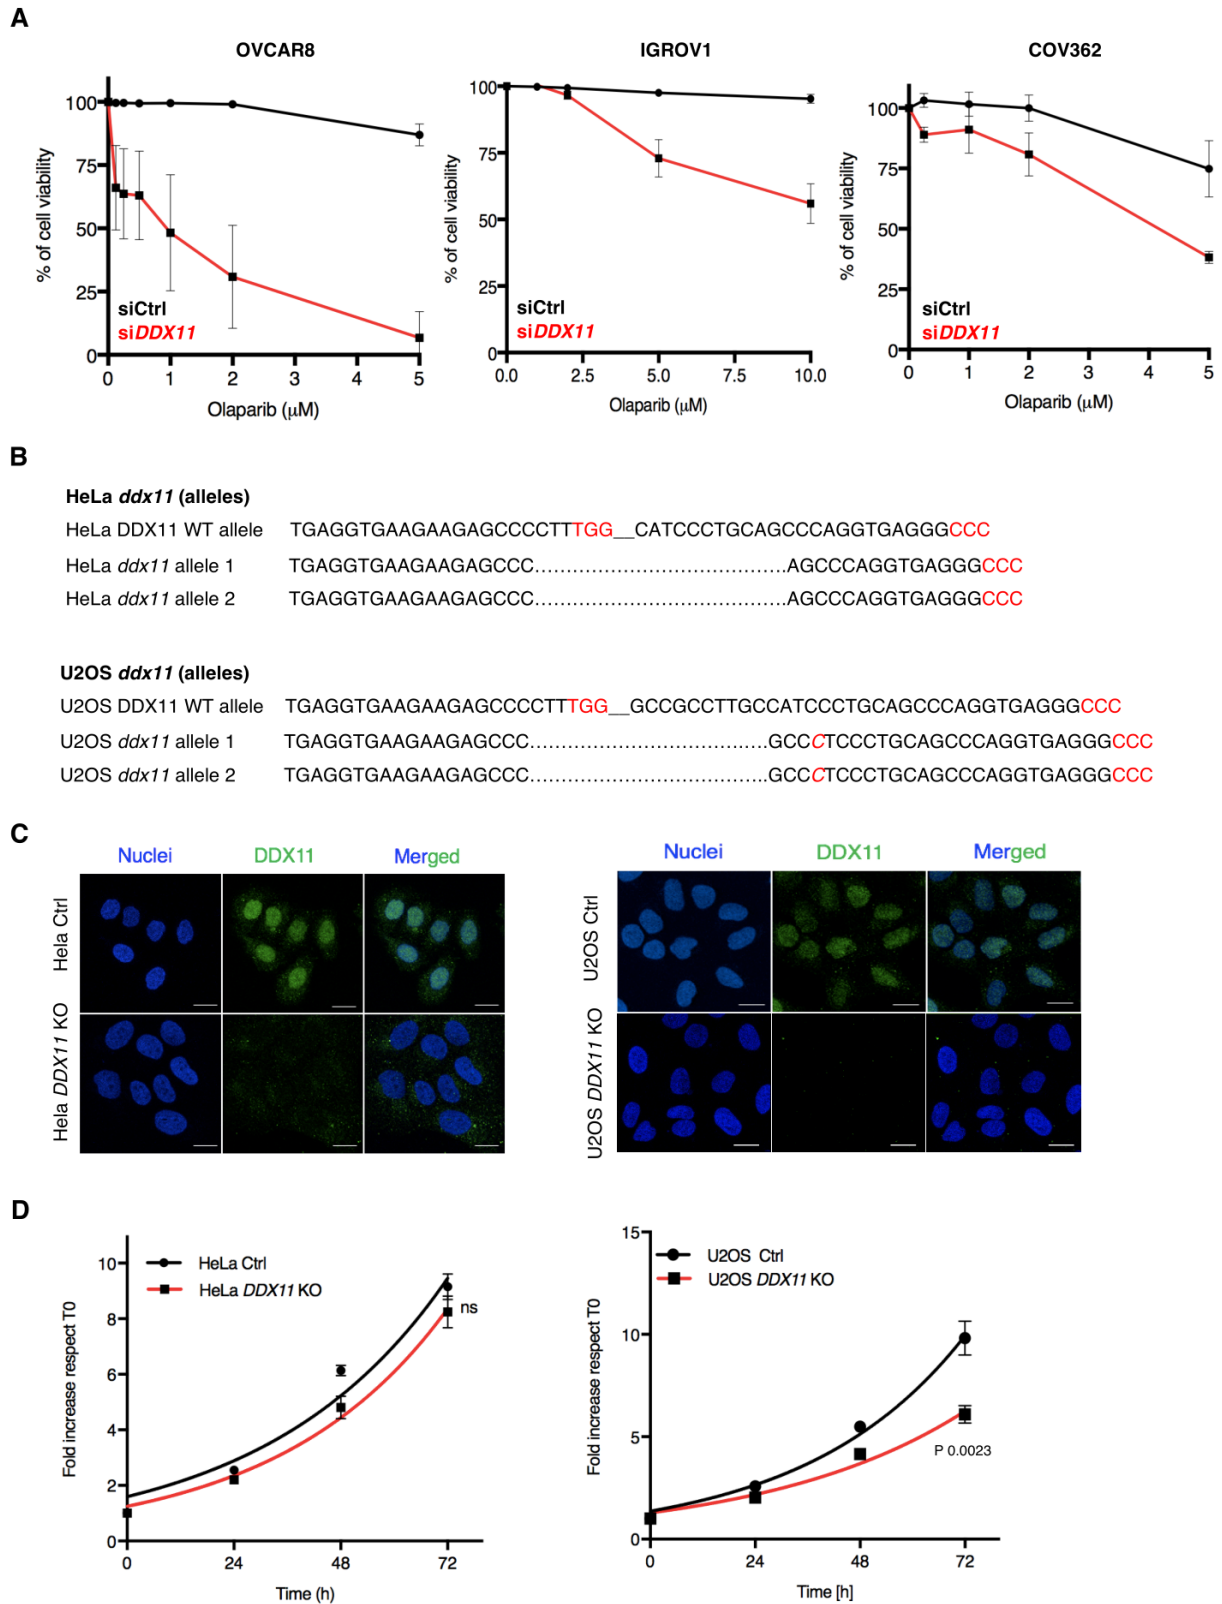

**Fig. S2 Loss of DDX11 sensitizes ovarian cancer cell lines and establishment of *DDX11* knockout**

**A**, Sensitivity assay of different ovarian cancer cell lines transfected with siCtrl and si*DDX11* upon Olaparib treatment with the indicated drug concentrations (n=3 for OVCAR8 and COV362 and n=2

for IGROV1). Cell viability was determined using crystal violet staining after 5 days of drug treatment. Error bars show average  $\pm$  SEM. **B**, Sangers sequencing of *DDX11* genomic loci of HeLa and U2OS Ctrl and *DDX11* KO cells respectively. **C**, Immunofluorescence analysis of DDX11 in HeLa and U2OS Ctrl and *DDX11* KO cells respectively. **D**, Cellular proliferation assay in HeLa and U2OS Ctrl and *DDX11* KO, respectively, using CellTiter-Glo at the indicated time points (n=3). Error bars show average  $\pm$  SEM.

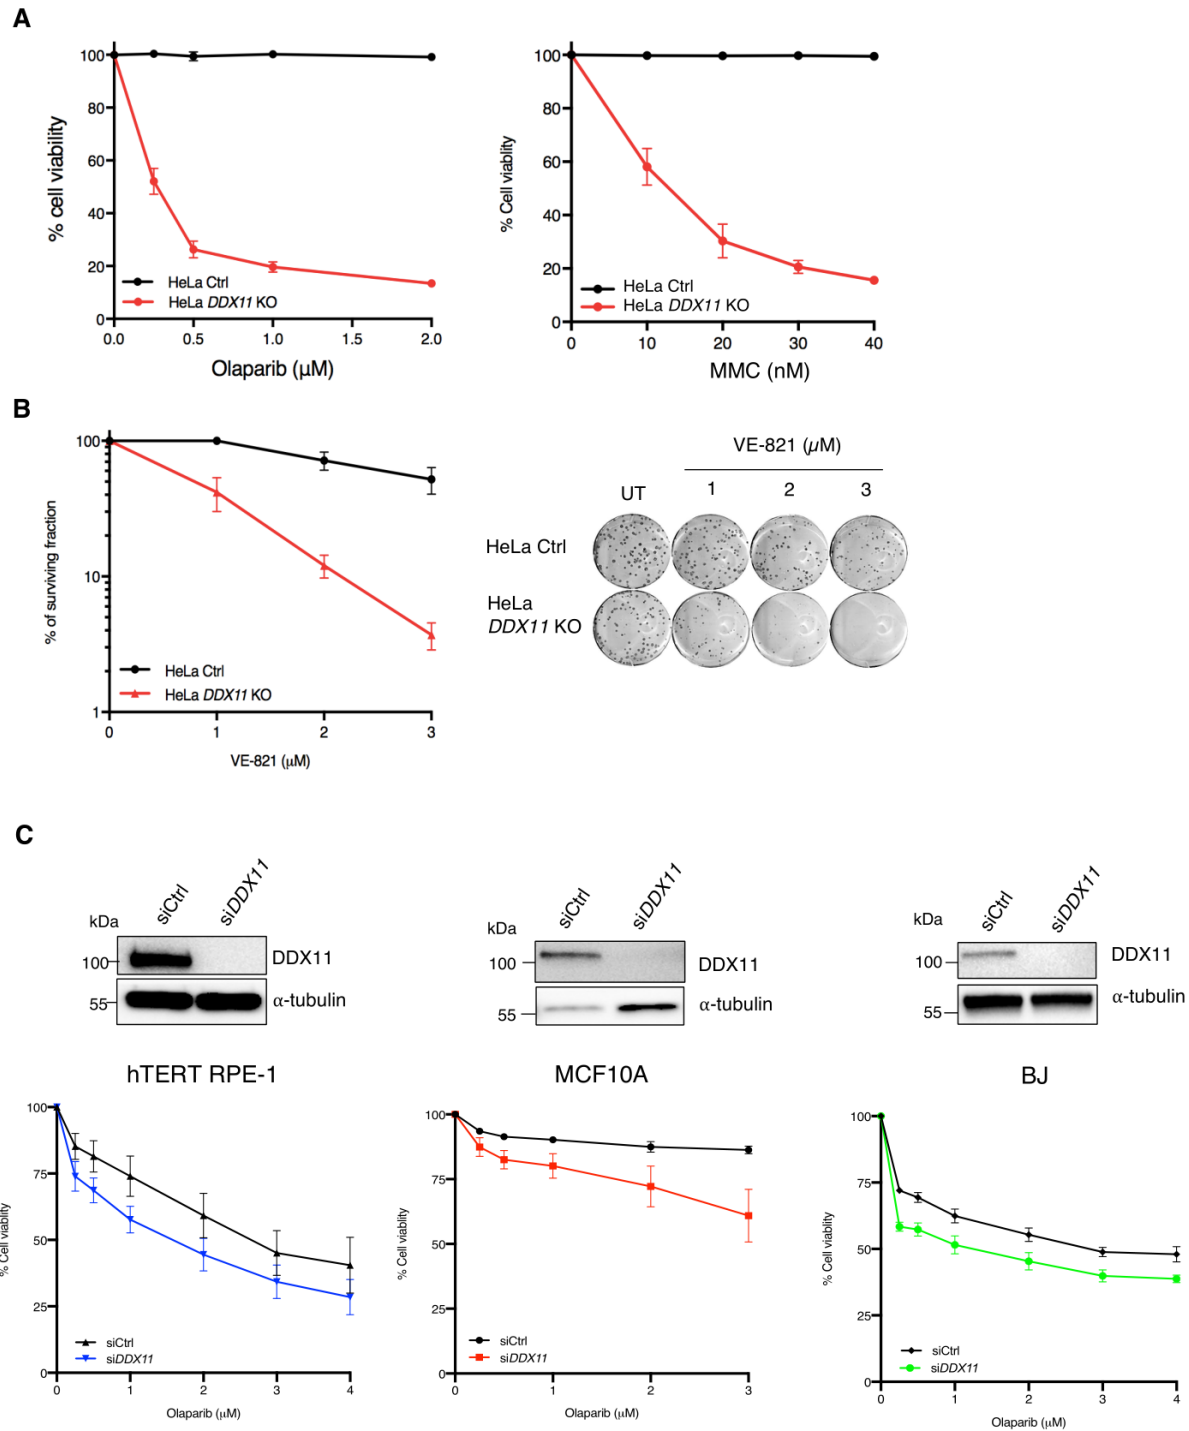

**Fig. S3 Validation of synthetic lethal drug combinations with *DDX11* knockout**

**A**, Cell viability assay of HeLa Ctrl and *DDX11* KO cells treated with Olaparib and Mitomycin-C (MMC) with the indicated concentrations (n=3). Cell viability was determined using crystal violet after 5 days of incubation. Error bars show average  $\pm$  SEM. **B**, Colony formation assay of HeLa Ctrl and *DDX11* KO cells treated with ATR inhibitor VE-821 (n=3) with the indicated drug concentrations. Colonies were stained with crystal violet after 10 to 15 days of incubation. Error bars show average  $\pm$  SEM. **C**, Cell viability assay of hTERT RPE-1, MCF10A and BJ cells transfected

with siCtrl and si*DDX11*. Cells were treated with Olaparib with the indicated concentrations (n=3). Cell viability was determined using crystal violet after 5 days of incubation. Error bars show average  $\pm$  SEM.

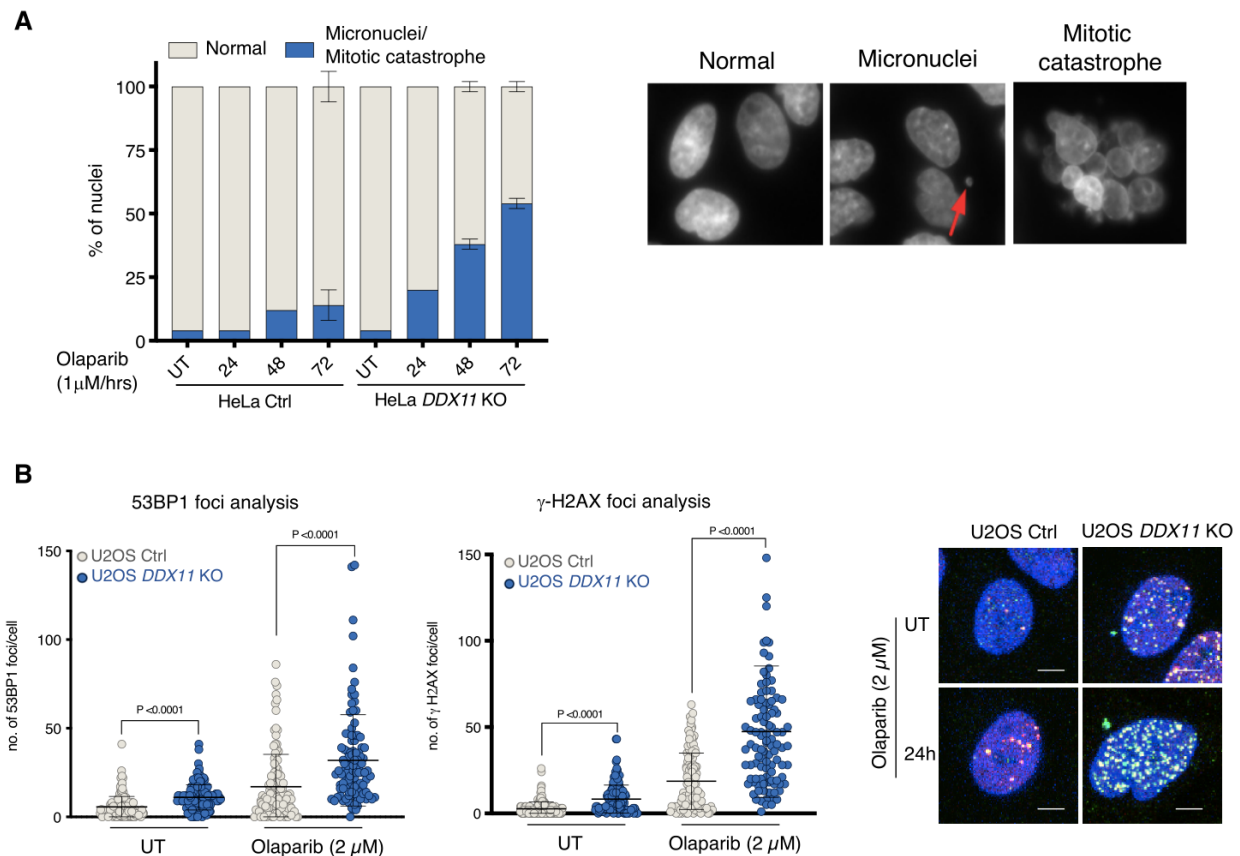

**Fig. S4 DDX11 loss associates with micronucleation and DNA damage accumulation**

**A**, Quantification of micronuclei and mitotic catastrophes in HeLa Ctrl and *DDX11* KO cells in untreated conditions and upon Olaparib (1  $\mu$ M) drug treatment for the indicated time points. Error bar shows average  $\pm$  SEM. **B**, Representative micrographs of 53BP1 and  $\gamma$ -H2AX focus formation in U2OS Ctrl and *DDX11* KO cells upon Olaparib (2  $\mu$ M) drug treatment for 24 hours (scale bar, 10  $\mu$ M). Quantification of foci is shown (n=2). Statistical analysis was performed using Student's *t*-test. Error bar shows average  $\pm$  SD.

**A**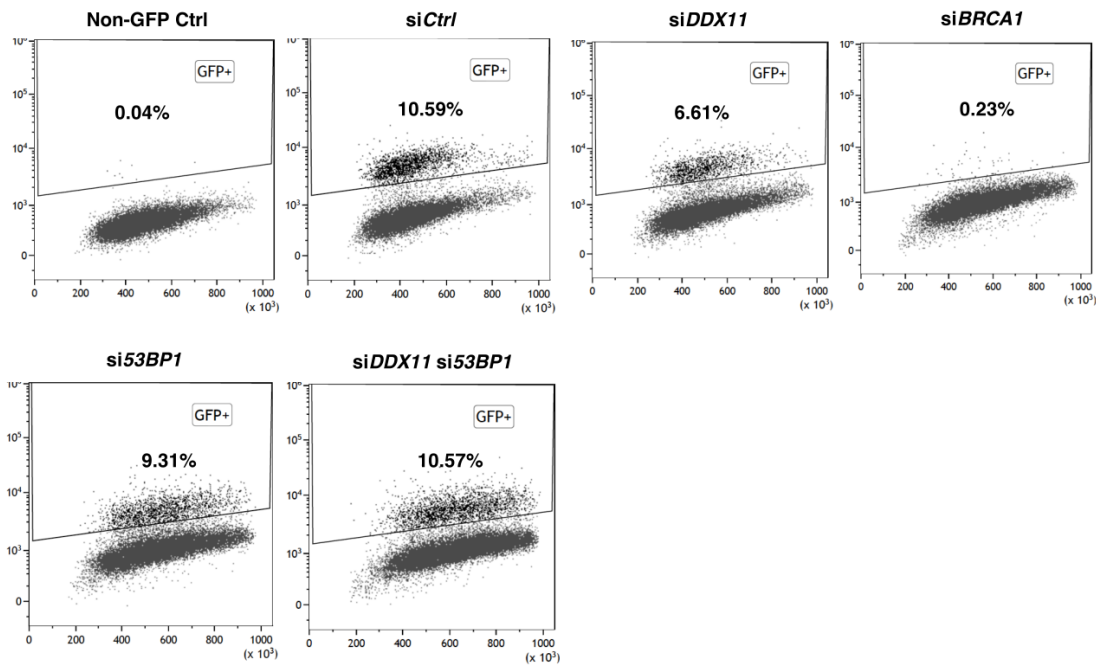**B**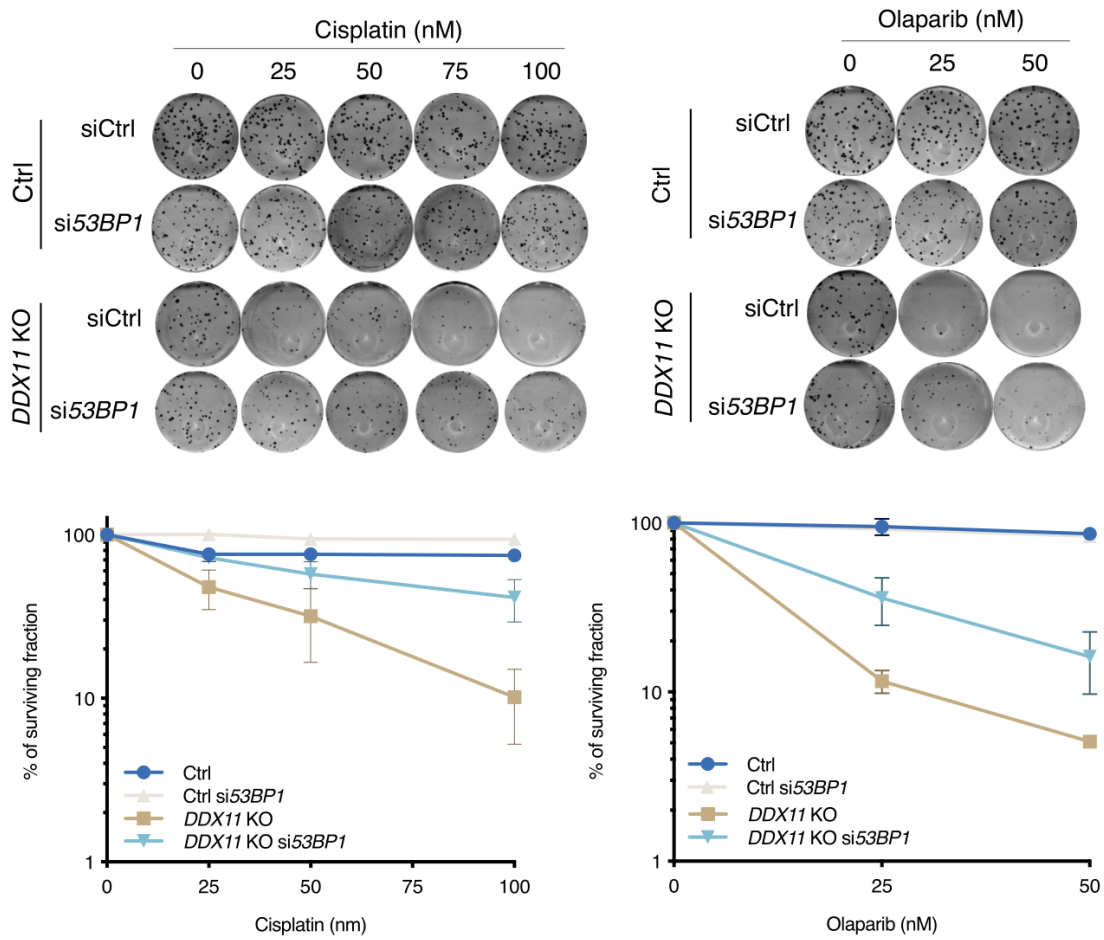



**Fig. S5 DDX11 promotes homology-directed repair of DSBs downstream of 53BP1**

**A**, Representation of flow cytometry scatter plot analysis of U2OS TRI DR-GFP cells transfected with indicated siRNAs for Fig. 4B. The analysis was performed 72 hours after I-SceI induction by doxycycline (n=3). Error bar shows average  $\pm$  SEM. **B**, Colony formation assay of HeLa Ctrl and *DDX11* KO cells transfected with the indicated siRNAs. Cell were chronically treated with Cisplatin (n=3) and Olaparib (n=2) and colonies were stained with crystal violet after 10 to 15 days of incubation. Error bar shows average  $\pm$  SEM.

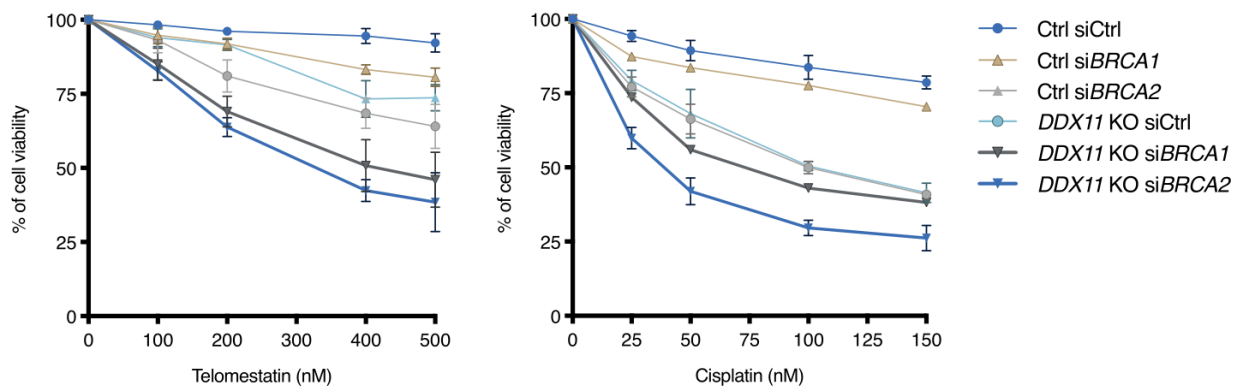

**Fig. S6 DDX11 has complementary functions to both BRCA1 and BRCA2 upon DNA damage**  
 HeLa Ctrl and *DDX11* KO cells were transfected with indicated siRNAs. Cell viability was determined using crystal violet staining after 5-6 days of incubation with the indicated concentrations of Telomestatin and Cisplatin,  $n \geq 3$ . Error bars show average  $\pm$  SEM.

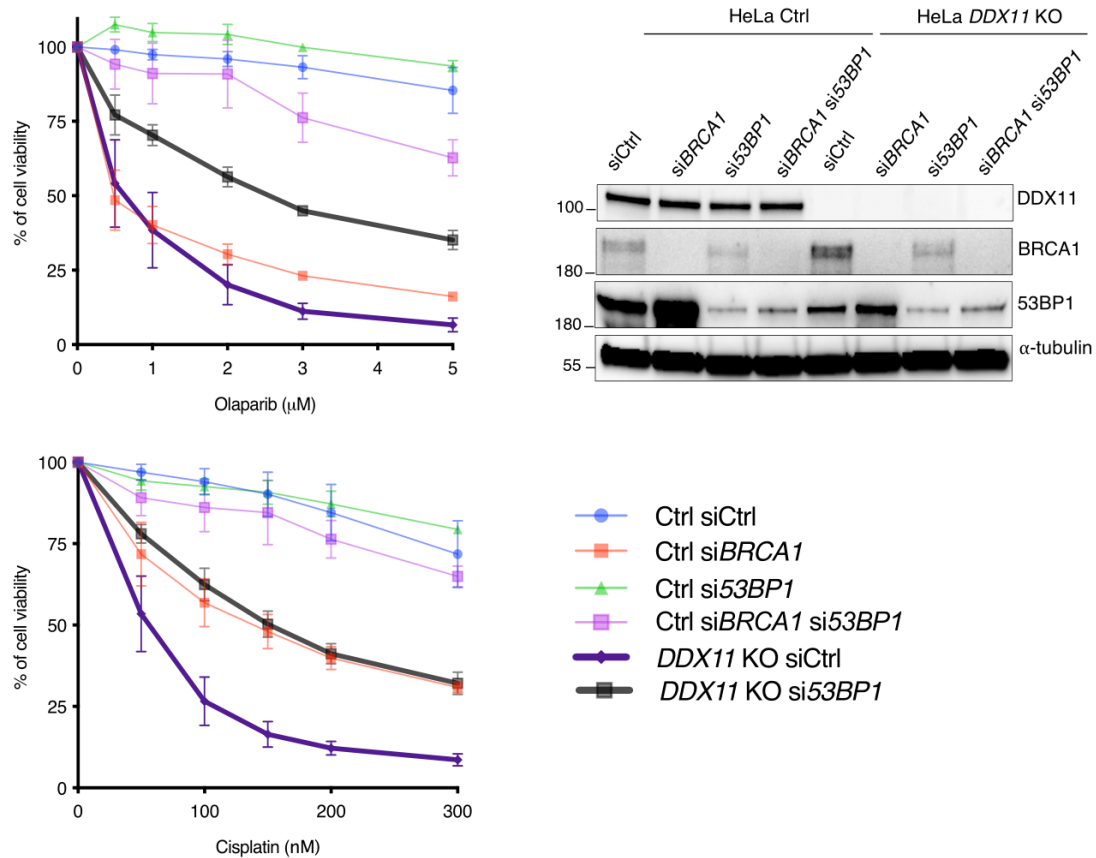

**Fig. S7. *DDX11* KO sensitivity is suppressed by 53BP1 depletion.** HeLa Ctrl and *DDX11* KO cells were transfected with indicated siRNAs. Cell viability was determined using crystal violet staining after 5-6 days of incubation with the indicated concentrations of Olaparib and Cisplatin, n=3. Error bars show average  $\pm$  SEM. Representative Western blot showing the depletion of indicated proteins using siRNAs is shown.

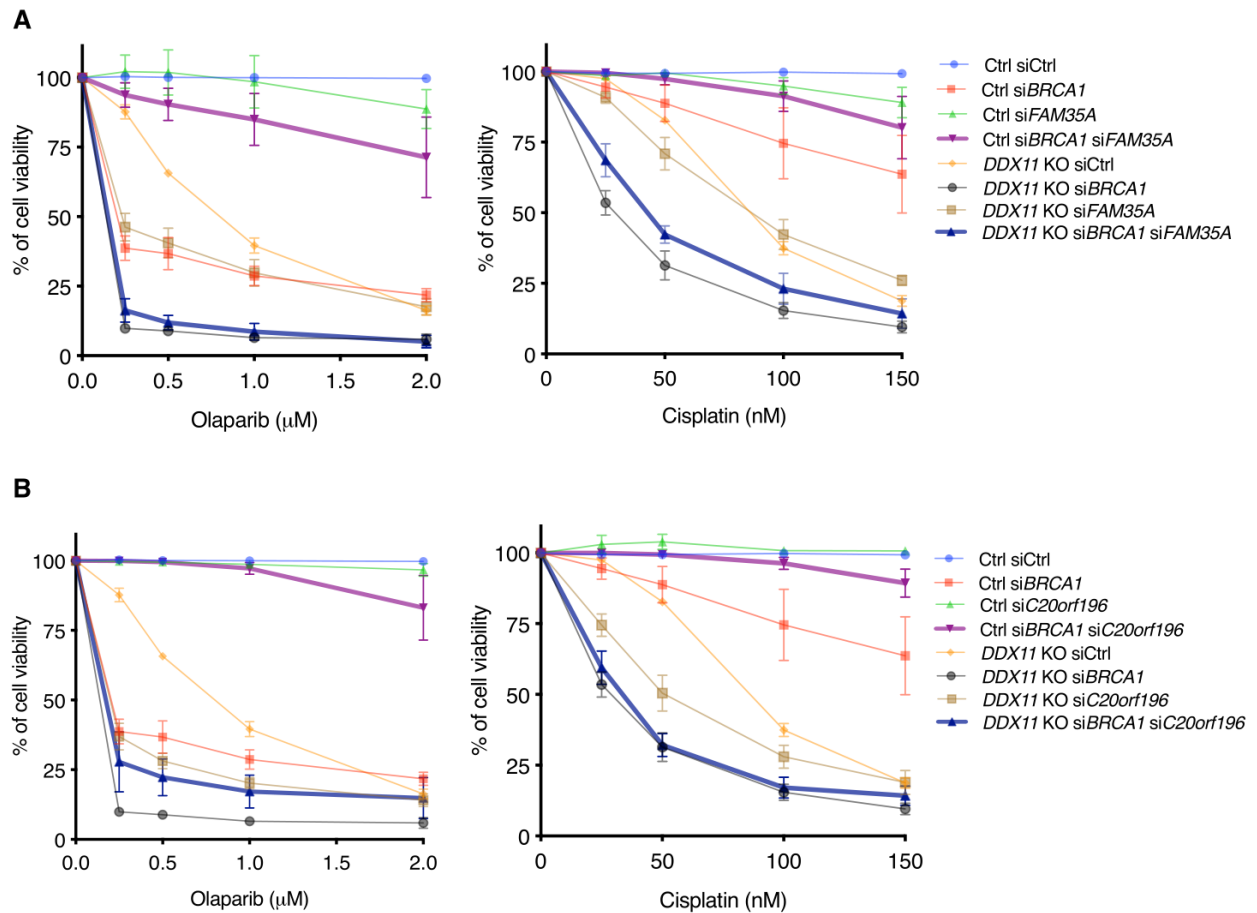

**Fig. S8 DDX11 is required for viability in *BRCA1* Shieldin depleted cells exposed to chemotherapeutic drugs.** A and B, Cell viability assay of HeLa Ctrl and *DDX11* KO cells transfected with indicated siRNAs. Cells were treated with Olaparib and Cisplatin with the indicated drug concentrations for 6 days (n=3). Cell viability was determined by using crystal violet staining. Error bars show average ± SEM.

**Supplementary Table 1. Summary of drug screen results for HeLa *DDX11* knockout**

| Name                            | Target                | HeLa DDX11 KO |
|---------------------------------|-----------------------|---------------|
| (+) JQ-1                        | BRD4                  | S             |
| Abitrexate (Methotrexate)       | DHFR                  | -             |
| ABT-263 (Navitoclax)            | Bcl-2                 | -             |
| Adrucil (Fluorouracil)          | DNA/RNA Synthesis     | -             |
| Alisertib                       | Aurora A              | -             |
| Alvocidib (Flavopiridol)        | CDK                   | -             |
| Aphidicolin                     | DNA polymerase        | -             |
| AT9283                          | Aurora, Abl, JAK2     | -             |
| Azacitidine                     | DNA methyltransferase | -             |
| AZD1152-HQPA (Barasertib)       | Aurora B              | -             |
| AZD1775                         | WEE1                  | -             |
| AZD5363                         | AKT                   | S             |
| AZD6738                         | ATR                   | S             |
| AZD7762                         | CHK1/2                | S             |
| AZD8186                         | PI3K                  | S             |
| AZD8835                         | PI3K                  | S             |
| BAY-1895344                     | ATR                   | -             |
| Bleomycin sulfate               | DNA/RNA Synthesis     | S             |
| Bortezomib (Velcade)            | Proteasome            | -             |
| Buparlisib (BKM-120)            | PI3K                  | -             |
| Carboplatin                     | DNA/RNA Synthesis     | S             |
| Carfilzomib                     | Proteasome            | S             |
| Carmofur                        | DNA/RNA Synthesis     | -             |
| Chlorambucil                    | DNA/RNA Synthesis     | -             |
| Cisplatin                       | DNA/RNA Synthesis     | S             |
| Cladribine                      | DNA/RNA Synthesis     | -             |
| Clofarabine                     | DNA/RNA Synthesis     | -             |
| Cytarabine                      | DNA/RNA Synthesis     | S             |
| Danusertib (PHA-739358)         | Aurora kinase         | -             |
| Decitabine                      | DNA/RNA Synthesis     | -             |
| Dinaciclib                      | CDK                   | -             |
| Doxorubicin (Adriamycin)        | Topoisomerase         | S             |
| Epirubicin Hydrochloride        | Topoisomerase         | S             |
| Etoposide (VP-16)               | Topoisomerase         | S             |
| Floxuridine                     | DNA/RNA Synthesis     | -             |
| Fludarabine Phosphate (Fludara) | DNA/RNA Synthesis     | -             |
| Ftorafur (Tegafur)              | DNA/RNA Synthesis     | -             |
| Gemcitabine HCl (Gemzar)        | DNA/RNA Synthesis     | -             |
| Hesperadin                      | Aurora B              | M             |
| Iniparib (BSI-201)              | PARP1                 | -             |
| KU-55933                        | ATM, DNA-PK, PI3K     | S             |

|                              |                         |   |
|------------------------------|-------------------------|---|
| Mitoxantrone Hydrochloride   | Topoisomerase           | S |
| NU7441                       | DNA-PK                  | - |
| Nutlin-3                     | p53/MDM2                | - |
| Obatoclax mesylate           | Bcl-2                   | - |
| Olaparib                     | PARP1/2                 | S |
| Omipalisib (GSK2126458)      | PI3K                    | - |
| Paclitaxel (Taxol)           | Microtubule Associated  | - |
| Palbociclib                  | CDK4/6                  | - |
| Pemetrexed                   | DHFR, DNA/RNA Synthesis | - |
| Ralimetinib (LY2228820)      | p38 MAPK                | S |
| Rapamycin (Sirolimus)        | mTOR                    | S |
| RITA                         | p53/MDM2                | M |
| Selaciclib (Roscovitine)     | CDK1/2/5                | - |
| Selumetinib (AZD6244)        | MEK1/2                  | - |
| Thioguanine                  | DNA methyltransferase   | R |
| Topotecan HCl                | Topoisomerase           | - |
| Tozasertib (VX-680)          | Aurora A                | - |
| Trabectedin (Yondelis)       | DNA synthesis           | - |
| Trametinib                   | MEK1/2                  | S |
| Vinblastine                  | Microtubule Associated  | - |
| Vistusertib (AZD2014)        | mTOR                    | S |
| Vorinostat (SAHA)            | HDAC                    | - |
| YM155 (Sepantronium bromide) | Survivin                | - |

**Abbreviation:**

Sensitization (S), Resistance (R), Moderate (M)

**Data Set Table 2 available as Excel File.**
